# 1 Preprints in motion: tracking changes 2 between preprint posting and journal 3 publication during a pandemic

4

5 Liam Brierley<sup>1</sup>, Federico Nanni<sup>2#</sup>, Jessica K Polka<sup>3#</sup>, Gautam Dey<sup>4</sup>, Máté Pálffy<sup>5</sup>, Nicholas Fraser<sup>6</sup> &  
6 Jonathon Alexis Coates<sup>7,\*</sup>  
7

8 <sup>1</sup> Department of Health Data Science, University of Liverpool, Brownlow Street, Liverpool, L69 3GL,  
9 UK

10 <sup>2</sup> The Alan Turing Institute, 96 Euston Rd, London NW1 2DB, UK

11 <sup>3</sup> ASAPbio, 3739 Balboa St # 1038, San Francisco, CA 94121, USA

12 <sup>4</sup> Cell Biology and Biophysics Unit, European Molecular Biology Laboratory, Meyerhofstr. 1, 69117  
13 Heidelberg, Germany

14 <sup>5</sup> The Company of Biologists, Bidder Building, Station Road, Histon, Cambridge CB24 9LF, UK

15 <sup>6</sup> Leibniz Information Centre for Economics, Düsternbrooker Weg 120, 24105 Kiel, Germany

16 <sup>7</sup> William Harvey Research Institute, Charterhouse Square, Barts and the London School of Medicine  
17 and Dentistry Queen Mary University of London, London, EC1M 6BQ, UK

18

19

20

21 \* Correspondence: [jonathon.coates@qmul.ac.uk](mailto:jonathon.coates@qmul.ac.uk)

22 # These authors contributed equally

23

24

## 25 Abstract

26 Amidst the COVID-19 pandemic, preprints in the biomedical sciences are being posted and accessed  
 27 at unprecedented rates, drawing widespread attention from the general public, press and  
 28 policymakers for the first time. This phenomenon has sharpened longstanding questions about the  
 29 reliability of information shared prior to journal peer review. Does the information shared in  
 30 preprints typically withstand the scrutiny of peer review, or are conclusions likely to change in the  
 31 version of record? We assessed preprints from bioRxiv and medRxiv that had been posted and  
 32 subsequently published in a journal through 30<sup>th</sup> April 2020, representing the initial phase of the  
 33 pandemic response. We utilised a combination of automatic and manual annotations to quantify  
 34 how an article changed between the preprinted and published version. We found that the total  
 35 number of figure panels and tables changed little between preprint and published articles.  
 36 Moreover, the conclusions of 7.2% of non-COVID-19-related and 17.2% of COVID-19-related  
 37 abstracts undergo a discrete change by the time of publication, but the majority of these changes do  
 38 not qualitatively change the conclusions of the paper.

39

40

41

42

43

44

45

46

47

48

## 49 Introduction

50 Global health and economic development in 2020 were overshadowed by the COVID-19 pandemic,  
 51 which grew to over 3.2 million cases and 220,000 deaths within the first four months of the year [1–  
 52 3]. The global health emergency created by the pandemic has demanded the production and  
 53 dissemination of scientific findings at an unprecedented speed via mechanisms such as preprints,  
 54 which are scientific manuscripts posted by their authors to a public server prior to the completion  
 55 journal-organised peer review [4–6]. Despite a healthy uptake of preprints by the bioscience  
 56 communities in recent years [7], some concerns persist [8–10]. In particular, one such argument  
 57 suggests that preprints are less reliable than peer-reviewed papers, since their conclusions may  
 58 change in a subsequent version. Such concerns have been amplified during the COVID-19 pandemic,  
 59 since preprints are being increasingly used to shape policy and influence public opinion via coverage  
 60 in social and traditional media [11,12]. One implication of this hypothesis is that the peer review  
 61 process will correct many errors and improve reproducibility leading to significant differences  
 62 between preprints and published versions.

63 Several studies have assessed such differences. For example, Klein *et al.* used quantitative measures  
 64 of textual similarity to compare preprints from arXiv and bioRxiv with their published versions [13],  
 65 concluding that papers change “very little.” Recently, Nicholson *et al.* employed document  
 66 embeddings to show that preprints with greater textual changes compared with the journal versions  
 67 took longer to be published and were updated more frequently [14]. However, changes in the  
 68 meaning of the content may not be directly related to changes in textual characters, and vice-versa  
 69 (e.g., a major rearrangement of text or figures might simply represent formatting changes while the  
 70 position of a single decimal point could significantly alter conclusions). Therefore, sophisticated  
 71 approaches aided or validated by manual curation are required, as employed by two recent studies.  
 72 Using preprints and published articles, both paired and randomised, Carneiro *et al.* employed  
 73 manual scoring of methods sections to find modest, but significant improvements in the quality of  
 74 reporting among published journal articles [15]. Pagliaro manually examined the full text of 10  
 75 preprints in chemistry, finding only small changes in this sample [16], and Kataoka compared the full  
 76 text of medRxiv RCTs related to COVID, finding in preprint versions an increased rate of spin (positive  
 77 terms in the title or abstract conclusion section used to describe non-significant results [17]. Bero *et*  
 78 *al* [18] and Oikonomidi *et al* [19] investigated changes in conclusions reported in COVID-related  
 79 clinical studies, finding that some preprints and journal articles differed in the outcomes reported.  
 80 However, the frequency of changes in the conclusions of a more general sample of preprints  
 81 remained an open question. We sought to identify an approach that would detect such changes  
 82 effectively and without compromising on sample size. We divided our analysis between COVID-19

83 and non-COVID-19 preprints, as extenuating circumstances such as expedited peer review and  
84 increased attention [11] may impact research related to the pandemic.

85 To investigate how preprints have changed upon publication, we compared abstracts, figures, and  
86 tables of bioRxiv and medRxiv preprints with their published counterparts to determine the degree  
87 to which the top-line results and conclusions differed between versions. In a detailed analysis of  
88 abstracts, we found that most scientific articles undergo minor changes without altering the main  
89 conclusions. While this finding should provide confidence in the utility of preprints as a way of  
90 rapidly communicating scientific findings that will largely stand the test of time, the value of  
91 subsequent manuscript development, including peer review, is underscored by the 7.2% of non-  
92 COVID-19-related and 17.2% of COVID-19-related preprints with major changes to their conclusions  
93 upon publication.

94

## 95 Results

### 96 COVID-19 preprints were rapidly published during the early phase of the pandemic

97 The COVID-19 pandemic has spread quickly across the globe, reaching over 3.2 million cases  
98 worldwide within 4 months of the first reported case [1]. The scientific community responded  
99 concomitantly, publishing over 16,000 articles relating to COVID-19 within 4 months [11]. A large  
100 proportion of these articles (>6000) were manuscripts hosted on preprint servers. Following this  
101 steep increase in the posting of COVID-19 research, traditional publishers adapted new policies to  
102 support the ongoing public health emergency response efforts, including efforts to fast-track peer-  
103 review of COVID-19 manuscripts (for example, *eLife* [20]). At the time of our data collection in May  
104 2020, 4.0% of COVID-19 preprints were published by the end of April, compared to the 3.0% of non-  
105 COVID-19 preprints that were published such that we observed a significant association between  
106 COVID-19 status (COVID-19 or non-COVID-19 preprint) and published status (Chi-square test;  $\chi^2 =$   
107 6.78,  $df = 1$ ,  $p = 0.009$ ,  $n = 14,812$ ) (Fig. 1A). When broken down by server, 5.3% of COVID-19  
108 preprints hosted on bioRxiv were published compared to 3.6% of those hosted on medRxiv  
109 (Supplemental Fig. 1A). However, a greater absolute number of medRxiv vs bioRxiv COVID-19  
110 preprints (71 vs 30) were included in our sample of detailed analysis of text changes (see Methods),  
111 most likely a reflection of the different focal topics between the two servers (medRxiv has a greater  
112 emphasis on medical and epidemiological preprints).

113 A major concern with expedited publishing is that it may impede the rigor of the peer review process  
114 [21]. Assuming that the version of the manuscript originally posted to the preprint server is likely to

be similar to that subjected to peer review, we looked to journal peer review reports to reveal reviewer perceptions of submitted manuscripts. For our detailed sample of  $n = 184$  preprint-published article pairs, we assessed the presence of transparent peer review (defined as openly available peer review reports published by the journal alongside the article; we did not investigate the availability of non-journal peer reviews of preprints) and found that only a minority of preprints that were subsequently published were associated with transparent journal reviews, representing 3.4% of COVID-19 preprints and 12.4% of non-COVID-19 preprints examined, though we did not observe strong evidence of an association between COVID-19 status and transparent peer review ( $\chi^2 = 3.76$ ,  $df = 1$ ,  $p = 0.053$ ) (Fig. 1B). The lack of transparent peer reviews was particularly apparent for research published from medRxiv (Supplemental Fig. 1B). Data availability is a key component of the open science initiative, but journal policies differ in the requirement for open data. Moreover, evidence suggests that non-scientists are utilising underlying raw data to promote misinformation [22]; we therefore investigated the availability of underlying data associated with preprint-published article pairs. There was little difference in data availability between the preprint and published version of an article. Additionally, we found no evidence of association between overall data availability and COVID-19 status (Fisher's exact, 1000 simulations;  $p = 0.583$ ). However, we note that a greater proportion of COVID-19 articles had a reduction in data availability when published (4.6% vs 2.1%) and vice-versa, a greater proportion of non-COVID-19 articles were more likely to have additional data available upon publishing (20.6% vs 12.6%) (Fig. 1C). This trend was reflected when broken down by preprint server (Supplemental Fig. 1C).

The number of authors may give an indication of the amount of work involved; we therefore assessed authorship changes between the preprint and published articles. Although the vast majority (>85%) of preprints did not have any changes in authorship when published (Fig. 1D), we found weak evidence of association between authorship change (categorised as any vs none) and COVID-19 status ( $\chi^2 = 3.90$ ,  $df = 1$ ,  $p = 0.048$ ). Specifically, COVID-19 preprints were almost three times as likely to have additional authors (categorised as any addition vs no additions) when published compared to non-COVID-19 preprints (17.2% vs 6.2%) ( $\chi^2 = 4.51$ ,  $df = 1$ ,  $p = 0.034$ ). When this data was broken down by server, we found that none of the published bioRxiv preprints had any author removals or alterations in the corresponding author (Supplemental Fig. 1D).

Having examined the properties of preprints that were being published within our timeframe, we next investigated which journals were publishing these preprints. Among our sample of published preprints, those describing COVID-19 research were split across many journals, with clinical or multidisciplinary journals tending to publish the most papers that were previously preprints (Fig. 1E).

Non-COVID-19 preprints were mostly published in *PLOS ONE*, although they were also found in more selective journals, such as *Cell Reports*. When broken down by server, preprints from bioRxiv were published in a range of journals, including the highly selective *Nature* and *Science* (Supplemental Fig. 1E & F); interestingly, these were all COVID-19 articles. Together, these data reveal that preprints are published in diverse venues and suggest that during the early phase of the pandemic, COVID-19 preprints were being expedited through peer review compared to non-COVID-19 preprints. However, published articles were rarely associated with transparent peer review and 38% of the literature sampled had limited data availability, with COVID-19 status having little impact on these statistics.

### Figures do not majorly differ between the preprint and published version of an article

One proxy for the total amount of work, or number of experiments, within an article is to quantify the number of panels in each figure [23]. We therefore quantified the number of panels and tables in each article in our dataset.

We found that, on average, there was no difference in the total number of panels and tables between the preprint and published version of an article. However, COVID-19 articles had fewer total panels and tables compared to non-COVID-19 articles (Mann-Whitney; median (IQR) = 7 (6.25) vs 9 (10) and  $p = 0.001$  for preprints, median (IQR) = 6 (7) vs 9 (10) and  $p = 0.002$  for published versions) (Fig. 2A). For individual preprint-published pairs, we found comparable differences in numbers of panels and tables for COVID-19 and non-COVID-19 articles (Fig. 2B). Preprints posted to bioRxiv contained a higher number of total panels and tables (Mann-Whitney;  $p < 0.001$  for both preprints and their published versions) and greater variation in the difference between the preprint and published articles than preprints posted to medRxiv (Fligner-Killeen;  $\chi^2 = 9.41$ ,  $df = 1$ ,  $p = 0.002$ ) (Supplemental Fig. 2A & B).

To further understand the types of panel changes, we classified the changes in panels and tables as panels being added, removed or rearranged. Independent of COVID-19-status, over 75% of published preprints were classified with “no change” or superficial rearrangements to panels and tables, confirming the previous conclusion. Despite this, approximately 23% of articles had “significant content” added or removed from the figures between preprint and final versions (Fig. 2C). None of the preprints posted to bioRxiv experienced removal of content upon publishing (Supplemental Fig. 2C).

This data suggests that, for most papers in our sample, the individual panels and tables do not majorly change upon journal publication, suggesting that there are limited new experiments or analyses when publishing previously posted preprints.

We found no discernible pattern in the degree to which figures changed based on the destination journal of either COVID (Fig. 2D) or non-COVID papers (Fig. 2E), though the latter were distributed among a larger range of journals.

### The majority of abstracts do not discretely change their main conclusions between the preprint and published article

We compared abstracts between preprints and their published counterparts that had been published in the first four months of the COVID-19 pandemic (January – April 2020 with an extended window for non-COVID articles of September 2019 – April 2020). Abstracts contain a summary of the key results and conclusions of the work and are freely-accessible, they are the most read section. To computationally identify all individual changes between the preprint and published versions of the abstract and derive a quantitative measure of similarity between the two, we applied a series of well-established string-based similarity scores, already validated to work for such analyses. We initially employed the python SequenceMatcher (difflib module), based on the “Gestalt Pattern Matching” algorithm [24] which determines a change ratio by iteratively aiming to find the longest contiguous matching subsequence given two pieces of text. We found that COVID-19 abstracts had a significantly greater change ratio than non-COVID-19 abstracts (Mann-Whitney; median (IQR) = 0.338 (0.611) vs 0.197 (0.490) and  $p = 0.010$ ), with a sizeable number ( $n = 20$ ) appearing to have been substantially re-written such that their change ratio was  $\geq 0.75$  (Fig. 3A). However, one limitation of this method is that it cannot always handle re-arrangements properly (for example, a sentence moved from the beginning of the abstract to the end) and these are often counted as changes between the two texts. As a comparison to this open source implementation, we employed the output of the Microsoft Word track changes algorithm and used this as a different type of input for determining the change ratio of two abstracts.

Using this method, we confirmed that abstracts for COVID-19 articles changed more than for non-COVID-19 articles (Mann-Whitney; median (IQR) = 0.203 (0.287) vs 0.094 (0.270) and  $p = 0.007$ ), although the overall degree of changes observed were reduced (Fig. 3B); this suggests that while at first look a pair of COVID-19 abstracts may seem very different between their preprint and published version, most of these changes are due to re-organisation of the content. Nonetheless, the output

obtained by the Microsoft Word track changes algorithm highlights that it is more likely that COVID-19 abstracts undergo larger re-writes (i.e., their score is closer to 1.0).

Since text rearrangements may not result in changes in meaning, four annotators independently annotated the compared abstracts according to a rubric we developed for this purpose (Table 2, Supplemental Method 2). We found that independent of COVID-19-status, a sizeable number of abstracts did not undergo any meaningful changes (24.1% of COVID-19 and 36.1% of non-COVID-19 abstracts). Over 50% of abstracts had changes that minorly altered, strengthened, or softened the main conclusions (Fig. 3C, see representative examples in Supplemental Table 2). 17.2% of COVID-19 abstracts and 7.2% of non-COVID-19 abstracts had major changes in their conclusions. A main conclusion of one of these abstracts (representing 0.5% of all abstracts scored) contradicted its previous version. Excerpts including each of these major changes are listed in Supplemental Table 3. Using the degree of change, we evaluated how the manual scoring of abstract changes compared with our automated methods. We found that difflib change ratios and Microsoft Word change ratios significantly differed between our manual rating of abstracts based on highest change (Kruskal-Wallis;  $p < 0.001$  in both cases) (Supplemental Fig. 3A, 3B). Specifically, change ratios were significantly greater in abstracts having ‘minor change’ than ‘no change’ (Post-hoc Dunn’s test; Bonferroni-adjusted  $p < 0.001$  in both cases), but abstracts having ‘major change’ were only greater than ‘minor change’ for Microsoft Word and not difflib change ratio (Bonferroni-adjusted  $p = 0.01$ , 0.06, respectively).

Among annotations that contributed minorly to the overall change of the abstract, we also annotated a neutral, positive, or negative direction of change (Table 2, Supplemental Method 2). Most of these changes were neutral, modifying the overall conclusions somewhat without directly strengthening or softening them (see examples in Supplemental Table 2). Among changes that strengthened or softened conclusions, we found abstracts that contained only positive changes or only negative changes, and many abstracts displayed both positive and negative changes (Fig. 3D), in both COVID-19 and non-COVID-19 articles. When we assessed the sum of positive or negative scores based on the manually rated abstract change degree, we found each score sum (i.e. number of positive or negative scores) significantly differed between ratings (Kruskal-Wallis;  $p < 0.001$  in both cases). Abstracts having ‘minor change’ had greater sum scores than those with ‘no change’ (Post-hoc Dunn’s test; Bonferroni-adjusted  $p < 0.001$  in both cases), while abstracts having ‘major change’ had greater sum positive scores than those with ‘minor change’, but not greater sum negative scores (Bonferroni-adjusted  $p = 0.019$ , 0.329 respectively) (Supplemental Fig. 3C).



We next assessed whether certain subsections of the abstract were more likely to be associated with changes. The majority of changes within abstracts were associated with results, with a greater observed proportion of such annotations for COVID-19 abstracts than non-COVID-19 abstracts (55.3% and 46.6%, respectively (Fig. 3E). We then evaluated the type of change in our annotations, for example changes to statistical parameters/estimates or addition or removal of information. This demonstrated that the most frequent changes were additions of new findings to the abstracts following peer review, followed by removals, which were more common among non-COVID-19 manuscripts (Fig. 3F). We also frequently found an increase in sample sizes or the use/reporting of statistical tests (type “stat+”) in the published version of COVID-19 articles compared to their preprints (Supplemental Table 2).

We then investigated whether abstracts with minor or major overall changes more frequently contained certain types or locations of changes. We found that abstracts with both major and minor conclusion changes had annotations in all sections, and both degrees of change were also associated with most types of individual changes. For non-COVID-19 abstracts, 80.7% of our annotated changes within conclusion sections and 92.2% of our annotated changes within contexts ( $n = 46$  and  $118$  annotations respectively) belonged to abstracts categorised as having only minor changes (Supplemental Fig. 3D). Moreover, the majority of annotated changes in statistics (between 73.9% and 96.7% depending on COVID-status and type of change) were within abstracts with minor changes (Supplemental Fig. 3E).

We next examined whether the manually rated degree of abstract change was associated with the delay between preprint posting and journal publication. COVID-19 articles in our annotated sample were published more rapidly (Mann-Whitney;  $p < 0.001$ ), with a median delay of 19 days (IQR = 15.5), compared to 101 days (IQR = 79) for non-COVID articles (Supplemental Fig. 3F). Although degree of change were not associated with publishing delay for COVID-19 articles (Kruskal-Wallis;  $p = 0.397$ ), an association was detected for non-COVID-19 articles ( $p = 0.002$ ). Specifically, non-COVID-19 articles with no change were published faster than those with minor changes (Post-hoc Dunn’s test; median (IQR) = 78 days (58) vs 113 days (73), and Bonferroni-adjusted  $p < 0.001$ ) but not faster than those with major changes (median (IQR) = 78 days (58) vs 111 days (42.5) and  $p = 0.068$ ) (Supplemental Fig. 3F), though we only observed seven such articles, limiting the interpretation of this finding.

We then investigated which journals were publishing preprints from those with each scored degree of change within our sample (Supplemental Fig. 3G and Supplemental Table 1). We found that *PLOS ONE* was the only journal to publish more than one preprint that we determined to have major

changes in the conclusions of the abstract, although this journal published the most observed non-COVID-19 preprints. Similarly, *PLOS One*, *Eurosurveillance*, *Science* and *Nature* were the only journals observed to published more than two preprints that we deemed as having any detectable conclusion changes (major or minor).

Finally, to confirm whether our observed patterns may differ for particular research fields, we examined degree and type of changes for a subgroup of medRxiv preprints. We selected the combined categories of ‘infectious diseases’ (n = 29) and ‘epidemiology’ (n = 28) as the most frequent of the 48 bioRxiv and medRxiv categorisations in our sample and the categories arguably most generally reflective of COVID-19 research (although ten of these preprints were non-COVID-19-related). For this subgroup, we confirmed COVID-19 abstracts had significantly greater difflib and Microsoft Word change ratios than non-COVID-19 abstracts (Mann-Whitney; p = 0.010, 0.007) (Supplemental Fig. 4A, 4B). Again, over 50% of these abstracts were rated as having minor changes and 17.5% rated as having major changes, though these mostly occurred within COVID-19 preprints (Supplemental Fig. 4C). Similar proportions of figure change ratings were also observed (Supplemental Fig. 4D), with a slightly greater proportion of non-COVID-19 preprints having figures rearranged. Locations and types of individual changes also appeared consistent between infectious disease/epidemiology preprints and our full sample, with slightly lower proportions of changes to results and changes involving removed assertions and increased statistical significant for non-COVID-19 preprints (Supplemental Fig. 4E, 4F).

These data reveal that abstracts of preprints mostly experience minor changes prior to publication. COVID-19 articles experienced greater alterations than non-COVID-19 preprints and were slightly more likely to have major alterations to the conclusions. Overall, most abstracts are comparable between the preprinted and published article.

### Changes in abstracts and figures are weakly associated with twitter attention, comments and citations

During the COVID-19 pandemic, preprints have received unprecedented attention across social media and in the use of commenting systems on preprint servers [11]. A small proportion of these comments and tweets can be considered as an accessory form of peer review [25]. We therefore next investigated if community commentary was associated with degree of changes to abstracts or figures. Additionally, to determine if the scientific community were detecting any difference in the reliability of the preprints that change upon publication, we also investigated associations between degree of changes and preprint citations.

Initially, we found significant associations between manually categorised degree of change to preprint abstracts and the numbers of tweets, preprint repository comments, and citations (Kruskal-Wallis;  $p = 0.038, 0.031, 0.008$ , respectively; Fig. 4). However, no associations were detected with degree of changes to figures ( $p = 0.301, 0.428, 0.421$ , respectively; Fig. 4). We also found significant weak positive correlations (Spearman's rank;  $0.133 \leq \rho \leq 0.205$ ) between each usage metric and automated diffli change ratios ( $p = 0.030, 0.009, 0.005$ , respectively) and Microsoft Word change ratios, except for number of tweets ( $p = 0.071, 0.020, 0.013$ , respectively).

When adjusted for COVID-19 status, delay between posting and publication, and total time online in a multivariate regression, several of these associations persisted (Table 1). Compared to preprints with no figure changes, those with rearranged figures were tweeted at almost three times the rate (rate ratio = 2.89, 95% CI = [1.54, 5.79]) while those with content added *and* removed were tweeted much lower rates (rate ratio = 0.11, 95% CI = [0.01, 1.74]). Additionally, preprint abstracts with text changes in published versions substantial enough to reach the maximum diffli change ratio (i.e., 1) had received comments at an estimated ten times the rate (rate ratio = 9.81, 95% CI = [1.16, 98.41]) and received citations at four times the rate (rate ratio = 4.26, 95% CI = [1.27, 14.90]) of preprints with no change (i.e., diffli change ratio = 0). However, among our detailed sample of 184 preprint-paper pairs, only a minority were observed to receive any comments ( $n = 28$ ) or citations at all ( $n = 81$ ), and usage was explained much more strongly by COVID-19 status and time since posted than any measure of change among our sampled pairs (Table 1).

**Table 1. Outputs from multivariate negative binomial regressions predicting counts of usage metrics for 184 preprint-paper pairs. LRT denotes likelihood ratio test statistic. Bold denotes covariates with  $p < 0.05$ .**

| Covariate term                                         | Tweets |        | Comments |        | Citations |        |
|--------------------------------------------------------|--------|--------|----------|--------|-----------|--------|
|                                                        | LRT    | p(LRT) | LRT      | p(LRT) | LRT       | p(LRT) |
| Degree of abstract change (no change/minor/major)      | 3.294  | 0.193  | 0.229    | 0.892  | 3.563     | 0.168  |
| Degree of figure change (no change/rearranged/content) | 17.443 | 0.002  | 5.974    | 0.201  | 5.116     | 0.276  |

|                                                               |        |         |        |       |        |                   |
|---------------------------------------------------------------|--------|---------|--------|-------|--------|-------------------|
| added/content removed)                                        |        |         |        |       |        |                   |
| Diffli b change ratio                                         | 1.272  | 0.259   | 4.392  | 0.036 | 5.564  | 0.018             |
| Microsoft Word change ratio                                   | 1.453  | 0.228   | 1.358  | 0.244 | 3.328  | 0.068             |
| COVID-19 status (COVID-19 or non-COVID-19)                    | 90.79  | < 0.001 | 10.627 | 0.001 | 86.207 | <b>&lt; 0.001</b> |
| Delay between preprint posting and journal publication (days) | 1.661  | 0.197   | 8.16   | 0.004 | 0.676  | 0.411             |
| Time since posted by end of sampling (days)                   | 13.264 | < 0.001 | 5.596  | 0.018 | 34.675 | <b>&lt; 0.001</b> |

331

332 Together, our sampled data suggest that the amount of attention given to a preprint does not reflect  
333 or impact how much it will change upon publication, though preprints undergoing discrete textual  
334 changes are commented upon and cited more often, perhaps reflecting additional value added by  
335 peer review.

336

## 337 Discussion

338 With a third of the early COVID-19 literature being shared as preprints [11], we assessed the  
339 differences between these preprints and their subsequently published versions, and compared these  
340 results to a similar sample of non-COVID-19 preprints and their published articles. This enabled us to  
341 provide quantitative evidence regarding the degree of change between preprints and published  
342 articles in the context of the COVID-19 pandemic. We found that preprints were most often passing  
343 into the "permanent" literature with only minor changes to their conclusions, suggesting that the

entire publication pipeline is having a minimal but beneficial effect upon preprints (for example by increasing sample sizes or statistics or by making author language more conservative) [13,15].

The duration of peer review has drastically shortened for COVID-19 manuscripts, although analyses suggest that these reports are no less thorough [26]. However, in the absence of peer review reports (Fig. 1B), one method of assessing the reliability of an article is for interested readers or stakeholders to re-analyse the data independently. Unfortunately, we found that many authors offered to provide data only upon request (Fig. 1). Moreover, a number of published articles had faulty hyperlinks that did not link to the supplemental material. This supports previous findings of limited data sharing in COVID-19 preprints [27] and faulty web links [28] and enables us to compare trends to the wider literature. It is apparent that the ability to thoroughly and independently review the literature and efforts towards reproducibility are hampered by current data sharing and peer reviewing practices. Both researchers and publishers must do more to increase reporting and data sharing practices within the biomedical literature [15,29]. Therefore, we call on journals to embrace open-science practices, particularly with regards to increased transparency of peer review and data availability.

Abstracts represent the first port of call for most readers, usually being freely available, brief, relatively jargon-free, and machine-readable. Importantly, abstracts contain the key findings and conclusions from an article. At the same time, they are brief enough to facilitate manual analysis of a large number of papers. To analyse differences in abstracts between preprint and paper, we employed multiple approaches. We first objectively compared textual changes between abstract pairs using a computational approach before manually annotating abstracts (Fig. 3). Both approaches demonstrated that COVID-19 articles underwent greater textual changes in their abstracts compared to non-COVID-19 articles. However, in determining the type of changes, we discovered that 7.2% of non-COVID-related abstracts and 17.2% of COVID-related abstracts had discrete, “major” changes in their conclusions. Indeed, 36.1% of non-COVID-19 abstracts underwent no meaningful change between preprint and published versions, though only 24.1% of COVID-19 abstracts were similarly unchanged. The majority of changes were “minor” textual alterations that lead to a minor change or strengthening or softening of conclusions. Of note, 31.9% of changes were additions of new data (Fig. 3F) (34.1% COVID-19 and 29.3% non-COVID). While previous works have focused their attention on the automatic processing of many other aspects of scientific writing, such as citation analysis [30], topic modelling [31], research relatedness based on content similarity [32], fact checking [33], and argumentative analysis [34], we are not aware of formal systemic comparisons between preprints and published papers that focused on tracking/extracting all changes, with related studies either producing coarse-grained analyses [13] or relying only on

derivative resources such as Wikipedia edit history [35], or utilizing a small sample size and a single reader [16]. Our dataset is a contribution to the research community that goes beyond the specificities of the topic studied in this work; we hope it will become a useful resource for the broader scientometrics community to assess the performance of natural language processing (NLP) approaches developed for the study of fine-grained differences between preprints and papers. Since our study required the manual collection of abstracts (a process that would be cumbersome for larger sample sizes), this potential would be amplified if increasing calls for abstracts and article metadata to be made fully open access were heeded ([29,36] and <https://i4oa.org/>).

Our findings that abstracts generally underwent few changes was further supported by our analysis of the figures. The total number of panels and tables did not significantly change between preprint and paper, independent of COVID-status. However, COVID-19 articles did experience greater variation in the difference in panel and table numbers compared to non-COVID-19 articles. Interestingly, we did not find a strong correlation between how much a preprint changed when published and the number of comments or tweets that the preprint received (Fig. 4). This may suggest that preprint comments are mostly not a form of peer review, as supported by a study demonstrating that only a minority of preprint comments are full peer reviews [25]. Additionally, as we have previously shown, most COVID-19 preprints during this early phase of the pandemic were receiving a high amount of attention on Twitter, regardless of whether or not they were published [11].

While our study provides context for readers looking to understand how preprints may change before journal publication, we emphasize several limitations. First, we are working with a small sample of articles that excludes preprints that were unpublished at the time of our analysis. Thus, we have selected a small minority of COVID-19 articles that were rapidly published, which may not be representative of those articles which were published more slowly. Moreover, as we were focussing on the immediate dissemination of scientific findings during a pandemic, our analysis does not encompass a sufficiently long timeframe to add a reliable control of unpublished preprints. This too would be an interesting comparison for future study. Indeed, an analysis comparing preprints that are eventually published with those that never become published would provide stronger and more direct findings of the role of journal peer review and the reliability of preprints.

Furthermore, our study is not a measure of the changes introduced by the peer review process. A caveat associated with any analysis comparing preprints to published papers is that it is difficult to determine when the preprint was posted relative to submission to the journal. In a survey of bioRxiv authors, 86% reported posting before receiving reviews from their first-choice journal, but others

report posting after responding to reviewers' comments or after journal rejection [4]. Therefore, the version first posted to the server may already be in response to one or more rounds of peer review (at the journal that ultimately publishes the work, or from a previous submission). The changes between the first version of the preprint (which we analysed) and the final journal publication may result from journal peer review, comments on the preprint, feedback from colleagues outside of the context of the preprint, and additional development by the authors independent of these sources. Perhaps as a result of these factors, we found an association between the degree of change and delay between preprint posting and journal publication, though only for non-COVID-19 articles, in agreement with Nicholson *et al* [14]. COVID-19 articles appear to have consistently been expedited through publication processes, regardless of degree of changes during peer review.

Although we did not try to precisely determine the number of experiments (i.e. by noting how many panels or tables were from a single experimental procedure), this is an interesting area of future work that we aim to pursue.

One of the key limitations of our data is the difficulty in objectively comparing two versions of a manuscript. Our approach revealed that computational approaches comparing textual changes at string-level do not predict the extent of change interpreted by human readers. For example, we discovered abstracts that contained many textual changes (such as rearrangements) that did not impact on the conclusions and were scored by annotators as having no meaningful changes. In contrast, some abstracts that underwent major changes as scored by annotators were found to have very few textual changes. This demonstrates the necessity that future studies will focus on more semantic natural language processing approaches when comparing manuscripts that go beyond shallow differences between strings of texts [37]. Recent research has begun to explore the potential of word embeddings for this task (see for instance [14], and Knoth and Herrmannova have even coined the term "Semantometrics" [32] to describe the intersection of NLP and Scientometrics. Nevertheless, the difficulty when dealing with such complex semantic phenomena is that different assessors may annotate changes differently. We attempted to develop a robust set of annotation guidelines to limit the impact of this. Our strategy was largely successful, but we propose a number of changes for future implementation. We suggest simplifying the categories (which would reduce the number of conflicting annotations) and conducting robust assessments of inter-annotator consistency. To do this, we recommend that a training set of data are utilised before assessors annotate independently. While this strategy is more time-consuming (due to the fact that annotator might need several training trials before reaching a satisfying agreement), in the long-run it is a more

scalable strategy as there will be no need of a meta-annotator double-checking all annotations against the guidelines, as we had in our work.

Our data analysing abstracts suggests that the main conclusions of 93% of non-COVID-related life sciences articles do not change from their preprint to final published versions, with only one out of 184 papers in our analysis contradicting a conclusion made by its preprint. This data supports the usual caveats that researchers should perform their own peer review any time they read an article, whether it is a preprint or published paper. Moreover, our data provides confidence in the use of preprints for dissemination of research.

## Methods

### Preprint metadata for bioRxiv and medRxiv

Our preprint dataset is derived from the same dataset presented in version 1 of Fraser *et al* [11]. In brief terms, bioRxiv and medRxiv preprint metadata (DOIs, titles, abstracts, author names, corresponding author name and institution, dates, versions, licenses, categories and published article links) were obtained via the bioRxiv Application Programming Interface (API; <https://api.biorxiv.org>). The API accepts a 'server' parameter to enable retrieval of records for both bioRxiv and medRxiv. Metadata was collected for preprints posted 4<sup>th</sup> September 2019 - 30th April 2020 (n = 14,812). All data were collected on 1st May 2020. Note that where multiple preprint versions existed, we included only the earliest version and recorded the total number of following revisions. Preprints were classified as "COVID-19 preprints" or "non-COVID-19 preprints" on the basis of the following terms contained within their titles or abstracts (case-insensitive): "coronavirus", "covid-19", "sars-cov", "ncov-2019", "2019-ncov", "hcov-19", "sars-2".

### Comparisons of figures and tables between preprints and their published articles

We identified COVID-19 bioRxiv and medRxiv preprints that have been subsequently published as peer reviewed journal articles (based on publication links provided directly by bioRxiv and medRxiv in the preprint metadata derived from the API) resulting in a set of 105 preprint-paper pairs. We generated a control set of 105 non-COVID-19 preprint-paper pairs by drawing a random subset of all bioRxiv and medRxiv preprints published in peer reviewed journals, extending the sampling period to 1st September 2019 - 30th April 2020 in order to preserve the same ratio of bioRxiv:medRxiv preprints as in the COVID-19 set. Links to published articles are likely an underestimate of the total proportion of articles that have been subsequently published in journals – both as a result of the



delay between articles being published in a journal and being detected by preprint servers, and preprint servers missing some links to published articles when e.g., titles change significantly between the preprint and published version [38]. Detailed published article metadata (titles, abstracts, publication dates, journal and publisher name) were retrieved by querying each DOI against the Crossref API (<https://api.crossref.org>), using the rcrossref package (version 1.10) for R [38]. From this set of 210 papers, we excluded manuscripts that 1) had been miscategorized by our algorithms as COVID or non-COVID, 2) that had been published in F1000Research or a similar Open Research platform and were therefore awaiting revision after peer review, 3) that were posted as a preprint after publication in a journal, 4) or that did not have abstracts in their published version, e.g. letters in medical journals. This left us with a set of 184 pairs for analysis.

Each preprint-paper pair was then scored independently by two referees using a variety of quantitative and qualitative metrics reporting on changes in data presentation and organisation, the quantity of data, and the communication of quantitative and qualitative outcomes between paper and preprint (using the reporting questionnaire; Supplemental Methods 1). Of particular note: individual figure panels were counted as such when labelled with a letter, and for pooled analyses a full table was treated as a single-panel figure. The number of figures and figure panels was capped at 10 each (any additional figures/panels were pooled), and the number of supplementary items (files/figures/documents) were capped at 5. In the case of preprints with multiple versions, the comparison was always restricted to version 1, i.e., the earliest version of the preprint. Any conflicting assessments were resolved by a third independent referee.

#### Annotating changes in abstracts

In order to prepare our set of 184 pairs for analysis of their abstracts, where abstract text was not available via the Crossref API, we manually copied it into the datasheet. To identify all individual changes between the preprint and published versions of the abstract and derive a quantitative measure of similarity between the two, we applied a series of well-established string-based similarity scores, already tested for this type of analyses: (1) the python SequenceMatcher (available as a core module in Python 3.8), based on the “Gestalt Pattern Matching” algorithm [24], determines a change ratio by iteratively aiming to find longest contiguous matching subsequence given two pieces of text; (2) as a comparison to this open source implementation, we employed the output of the Microsoft Word version 16.0.13001.20254 track changes algorithm (see details in Supplemental Method 3), and used this as a different type of input for determining the change ratio of two abstracts. To compute the change ratio of a pair of abstracts, following the

Python implementation, the formula is  $2 \cdot M / T$  where  $M$  is the number of characters in common and  $T$  the total number of characters in both sequences. The ratio will span between 1, if the abstracts are identical, and 0 if there is no snippet in common. As Microsoft Word track changes only provides statistics on the characters changed (inserted, removed, etc) but no information is available on the characters that are in common between two abstracts, we derive  $M$  by computing the total number of characters in the final abstract minus the characters that have been inserted. Apart from these two approaches, there is a large variety of tools and techniques to measure text similarity, especially employing word vector representations (see as a starting point the overview of Task 6 at SemEval 2012 [39], focused on “semantic textual similarity”). However, as these techniques are generally tailored for identifying similarity of “latent” topics more than explicit changes in phrasing, we decided to focus on the two approaches introduced above, as we were more familiar with their functionalities and output.

Employing the output of (2), which consisted in a series of highlighted changes for each abstract-pair, four co-authors independently annotated each abstract, based on a predefined set of labels and guidelines (Table 2, Supplemental Method 2). Each annotation contained information about the section of the abstract, the type of change that had occurred, and the degree to which this change impacted the overall message of the abstract. Changes (such as formatting, stylistic edits, or text rearrangements) without meaningful impact on the conclusions were not annotated. For convenience, we used Microsoft Word’s merge documents feature to aggregate annotations into a single document. We then manually categorised each abstract based on its highest degree of annotation: “no change” containing no annotations, “strengthening/softening, minor” containing only 1, 1-, or 1+, or “major conclusions change” containing either a 2 or a 3, since only a single abstract contained a 3. See Supplemental Tables 2 and 3 for a list of representative annotations for each type and all annotations that resulted in major conclusions change. The final set of annotations was produced by one of the authors (MP), who assigned each final label by taking into account the majority position across annotators, their related comments and consistency with the guidelines.

**Table 2. Tags (one each of section, type, and degree) applied to each annotation of text meaningfully changed in abstracts.**

| Section | Description                         |
|---------|-------------------------------------|
| context | Background or methods               |
| results | A statement linked directly to data |

|               |                                                                                       |
|---------------|---------------------------------------------------------------------------------------|
| conclusion    | Interpretations and/or implications                                                   |
| <b>Type</b>   | <b>Description</b>                                                                    |
| added         | New assertion                                                                         |
| removed       | Assertion removed                                                                     |
| nounchange    | One noun is substituted for another (“fever” becomes “high fever”)                    |
| effectreverse | The opposite assertion is now being made (word “negatively” added)                    |
| effect+       | The effect is now stronger (changes in verbs/adjectives/adverbs)                      |
| effect-       | The effect is now weaker (changes in verbs/adjectives/adverbs)                        |
| stat+         | Statistical significance increased (expressed as number or in words)                  |
| stat-         | Statistical significance decreased (expressed as number or in words)                  |
| statinfo      | Addition/removal of statistical information (like a new test or confidence intervals) |
| <b>Degree</b> | <b>Description</b>                                                                    |
| 1             | Significant: minorly alters a main conclusion of the paper                            |
| 1-            | Significant: softens a main conclusion of the paper                                   |
| 1+            | Significant: strengthens a main conclusion of the paper                               |
| 2             | Major: a discrete change in a main conclusion of the paper                            |
| 3             | Massive: a main conclusion of the paper contradicts its earlier version               |

537

### 538 Altmetrics, Citation and Comment Data

539 Counts of altmetric indicators (mentions in tweets) were retrieved via Altmetric  
540 (<https://www.altmetric.com>), a service that monitors and aggregates mentions to scientific articles  
541 on various online platforms. Altmetric provide a free API (<https://api.altmetric.com>) against which  
542 we queried each preprint DOI in our analysis set. Importantly, Altmetric only contains records where  
543 an article has been mentioned in at least one of the sources tracked, thus, if our query returned an  
544 invalid response we recorded counts for all indicators as zero. Coverage of each indicator (i.e., the  
545 proportion of preprints receiving at least a single mention in a particular source) for preprints were  
546 99.1%, 9.6%, and 3.5% for mentions in tweets, blogs and news articles respectively. The high  
547 coverage on Twitter is likely driven, at least in part, by automated tweeting of preprints by the  
548 official bioRxiv and medRxiv twitter accounts. For COVID-19 preprints, coverage was found to be  
549 100.0%, 16.6% and 26.9% for mentions in tweets, blogs and news articles respectively.

550 Citations counts for each preprint were retrieved from the scholarly indexing database Dimensions  
551 (<https://dimensions.ai>). An advantage of using Dimensions in comparison to more traditional

citation databases (e.g. Scopus, Web of Science) is that Dimensions also includes preprints from several sources within their database (including from bioRxiv and medRxiv), as well as their respective citation counts. When a preprint was not found, we recorded its citation counts as zero. Of all preprints, 3707 (14.3%) recorded at least a single citation in Dimensions. For COVID-19 preprints, 774 preprints (30.6%) recorded at least a single citation.

BioRxiv and medRxiv html pages feature a Disqus (<https://disqus.com>) comment platform to allow readers to post text comments. Comment counts for each bioRxiv and medRxiv preprint were retrieved via the Disqus API service (<https://disqus.com/api/docs/>). Where multiple preprint versions existed, comments were aggregated over all versions. As with preprint perceptions among public audiences on Twitter, we then examined perceptions among academic audiences by examining comment sentiment. Text content of comments for COVID-19 preprints were provided directly by the bioRxiv development team. Sentiment polarity scores were calculated for each comment on the top ten most-commented preprints using the lexicon and protocol previously described for the analysis of tweet sentiment.

## Statistical analyses

Categorical traits of preprints or annotations (e.g., COVID-19 or non-COVID-19; type of change) were compared by calculating contingency tables and using Chi-square tests or Fisher's exact tests using Monte Carlo simulation in cases where any expected values were < 5. Quantitative preprint traits (e.g., change ratios, citation counts) were correlated with other quantitative traits using Spearman's rank tests, homogeneity of variance tested for using Fligner-Killeen tests, and differences tested for using Mann-Whitney tests or Kruskal-Wallis for two-group and more than two-group comparisons, respectively. All univariate tests were interpreted using a significance level of 0.05., except for pairwise post-hoc group comparisons, which were tested using Dunn's test adjusting significance levels for multiple testing using Bonferroni correction. Benchmarked statistical power calculations suggested our sample size of n = 184 to detect medium effects with power > 0.98 (Supplemental Appendix S1).

For multivariate analyses of usage metrics (tweets, citations, comment counts) and number of authors added, we constructed generalised linear regression models with a log link and negative binomially-distributed errors using the function `glm.nb()` in R package 'MASS', v7.3-53 [40]. Negative binomial regressions included automated change ratios of each abstract, manually categorised degree of change to abstracts and figures, COVID-19 status, and delay between preprint posting and publication, adjusting for total time in days each preprint had been online by end of sampling (30th

April 2020). Covariate significance was determined using likelihood ratio tests comparing saturated models with/without covariates (LRTs). Multicollinearity between covariates was inspected using generalised variance inflation factors (VIFs) calculated using function `vif()` in R package ‘car’, v3.0-10 [41], ensuring no values were >10. 95% confidence intervals (CIs) around resulting rate ratios were calculated using profile likelihoods.

## Parameters and limitations of this study

We acknowledge a number of limitations in our study. Firstly, we analysed only bioRxiv and medRxiv, and many preprints appear on other servers [42]. In addition, to assign a preprint as COVID-19 or not, we used keyword matching to titles/abstracts on the preprint version at the time of our data extraction. This means we may have captured some early preprints, posted before the pandemic, that had been subtly revised to include a keyword relating to COVID-19. Our data collection period was a tightly defined window (January-April 2020 for COVID pairs and September 2019 – April 2020 for non-COVID pairs) meaning that our data suffers from survivorship and selection bias in that we could only examine preprints that have been published and our findings may not be generalisable to all preprints. A larger, more comprehensive sample would be necessary for more conclusive conclusions to be made. Additionally, a study assessing whether all major changes between a preprint and the final version of the article are reflected in changes in the abstract is necessary to further confirm the usefulness of examining variations in the abstracts as a proxy for determining variations in the full text. Furthermore, our automated analysis of abstract changes was affected by formatting-related changes in abstracts, such as the addition or removal of section headers to the abstract. For our manual analysis, each annotator initially worked independently, blinding them to others scoring. However, scores were then discussed to reach a consensus which may have impacted scores for individual pairs. Finally, our non-COVID-19 sample may not be representative of “normal” preprints, as many aspects of the manuscript preparation and publication process were uniquely affected by the pandemic during this time.

## Acknowledgements

NF acknowledges funding from the German Federal Ministry for Education and Research, grant numbers 01PU17005B (OASE) and 01PU17011D (QuaMedFo). LB acknowledges funding from a Medical Research Council Skills Development Fellowship award, grant number MR/T027355/1. GD thanks the European Molecular Biology Laboratory for support.

## Author contributions

Conceptualisation, N.F., L.B., G.D., J.K.P., M.P., J.A.C., F.N.; Methodology, N.F., L.B., G.D., J.K.P., M.P., J.A.C., F.N.; Software, N.F., L.B., J.A.C., F.N.; Validation, N.F., L.B., J.A.C.; Formal analysis, N.F., L.B., J.A.C., F.N.; Investigation, N.F., L.B., G.D., J.K.P., M.P., J.A.C.; Resources, J.K.P. and J.A.C.; Data curation, N.F., L.B., J.A.C., F.N.; Writing – original draft, N.F., L.B., G.D., J.K.P., M.P., J.A.C., F.N.; Writing – Review & editing, N.F., L.B., G.D., J.K.P., M.P., J.A.C., F.N.; Visualisation, J.K.P., L.B., J.A.C.; Supervision, J.A.C.; Project administration, J.A.C.

## Data availability

All data and code used in this study are available on github ([https://github.com/preprinting-a-pandemic/preprint\\_changes](https://github.com/preprinting-a-pandemic/preprint_changes)) and Zenodo ([10.5281/zenodo.4551541](https://doi.org/10.5281/zenodo.4551541)), as part of the first release.

## Declaration of interests

JP is the executive director of ASAPbio, a non-profit organization promoting the productive use of preprints in the life sciences. GD is a bioRxiv Affiliate, part of a volunteer group of scientists that screen preprints deposited on the bioRxiv server. GD and JAC are contributors to preLights and ASAPbio Fellows. The authors declare no other competing interests.

## References

1. WHO. COVID-19 situation report 19. 8 Feb 2020 [cited 13 May 2020]. Available: <https://www.who.int/docs/default-source/coronaviruse/situation-reports/20200501-covid-19-sitrep.pdf>
2. Zhu N, Zhang D, Wang W, Li X, Yang B, Song J, et al. A Novel Coronavirus from Patients with Pneumonia in China, 2019. *N Engl J Med*. 2020;382: 727–733. doi:10.1056/NEJMoa2001017
3. Coronaviridae Study Group of the International Committee on Taxonomy of Viruses. The species Severe acute respiratory syndrome-related coronavirus: classifying 2019-nCoV and naming it SARS-CoV-2. *Nat Microbiol*. 2020;5: 536–544. doi:10.1038/s41564-020-0695-z
4. Sever R, Roeder T, Hindle S, Sussman L, Black K-J, Argentine J, et al. bioRxiv: the preprint server for biology. *bioRxiv*. 2019; 833400. doi:10.1101/833400
5. Kaiser J, 2014, Am 12:00. BioRxiv at 1 year: A promising start. In: *Science | AAAS* [Internet]. 11 Nov 2014 [cited 13 May 2020]. Available: <https://www.sciencemag.org/news/2014/11/biorxiv-1-year-promising-start>
6. Rawlinson C, Bloom T. New preprint server for medical research. *BMJ*. 2019;365. doi:10.1136/bmj.l2301

- 652 7. Abdill RJ, Blekhman R. Tracking the popularity and outcomes of all bioRxiv preprints. Pewsey E,  
653 Rodgers P, Greene CS, editors. eLife. 2019;8: e45133. doi:10.7554/eLife.45133
- 654 8. Bagdasarian N, Cross GB, Fisher D. Rapid publications risk the integrity of science in the era of  
655 COVID-19. BMC Med. 2020;18: 192. doi:10.1186/s12916-020-01650-6
- 656 9. Majumder MS, Mandl KD. Early in the epidemic: impact of preprints on global discourse about  
657 COVID-19 transmissibility. Lancet Glob Health. 2020;0. doi:10.1016/S2214-109X(20)30113-3
- 658 10. Sheldon T. Preprints could promote confusion and distortion. Nature. 2018;559: 445–446.
- 659 11. Fraser N, Brierley L, Dey G, Polka JK, Pálffy M, Nanni F, et al. Preprinting the COVID-19  
660 pandemic. bioRxiv. 2020; 2020.05.22.111294. doi:10.1101/2020.05.22.111294
- 661 12. Adie E. COVID-19-policy dataset. 2020. doi:10.6084/m9.figshare.12055860.v2
- 662 13. Klein M, Broadwell P, Farb SE, Grappone T. Comparing published scientific journal articles to  
663 their pre-print versions. Int J Digit Libr. 2019;20: 335–350. doi:10.1007/s00799-018-0234-1
- 664 14. Nicholson DN, Rubinetti V, Hu D, Thielk M, Hunter LE, Greene CS. Linguistic Analysis of the  
665 bioRxiv Preprint Landscape. bioRxiv. 2021; 2021.03.04.433874.  
666 doi:10.1101/2021.03.04.433874
- 667 15. Carneiro CFD, Queiroz VGS, Moulin TC, Carvalho CAM, Haas CB, Rayê D, et al. Comparing  
668 quality of reporting between preprints and peer-reviewed articles in the biomedical literature.  
669 Res Integr Peer Rev. 2020;5: 16. doi:10.1186/s41073-020-00101-3
- 670 16. Pagliaro M. Preprints in Chemistry: An Exploratory Analysis of Differences with Journal Articles.  
671 Preprints; 2020 Nov. doi:10.22541/au.160513403.32560058/v1
- 672 17. Eisen MB, Akhmanova A, Behrens TE, Weigel D. Publishing in the time of COVID-19. eLife.  
673 2020;9: e57162. doi:10.7554/eLife.57162
- 674 18. Horbach SPJM. Pandemic publishing: Medical journals strongly speed up their publication  
675 process for COVID-19. Quant Sci Stud. 2020;1: 1056–1067. doi:10.1162/qss\_a\_00076
- 676 19. Vale RD. Accelerating scientific publication in biology. Proc Natl Acad Sci. 2015;112: 13439–  
677 13446. doi:10.1073/pnas.1511912112
- 678 20. Ratclif JW. Pattern Matching: the Gestalt Approach. In: Dr. Dobb's [Internet]. 1 Jul 1988 [cited  
679 15 Feb 2021]. Available: <http://www.drdoobs.com/database/pattern-matching-the-gestalt-approach/184407970>  
680
- 681 21. Malički M, Costello J, Alperin JP, Maggio LA. From amazing work to I beg to differ - analysis of  
682 bioRxiv preprints that received one public comment till September 2019. bioRxiv. 2020;  
683 2020.10.14.340083. doi:10.1101/2020.10.14.340083
- 684 22. Horbach SPJM. No time for that now! Qualitative changes in manuscript peer review during the  
685 Covid-19 pandemic. Res Eval. 2021 [cited 17 Feb 2021]. doi:10.1093/reseval/rvaa037
- 686 23. Sumner JQ, Haynes L, Nathan S, Hudson-Vitale C, McIntosh LD. Reproducibility and reporting  
687 practices in COVID-19 preprint manuscripts. medRxiv. 2020; 2020.03.24.20042796.  
688 doi:10.1101/2020.03.24.20042796

- 689 24. Klein M, Sompel HV de, Sanderson R, Shankar H, Balakireva L, Zhou K, et al. Scholarly Context  
690 Not Found: One in Five Articles Suffers from Reference Rot. PLOS ONE. 2014;9: e115253.  
691 doi:10.1371/journal.pone.0115253
- 692 25. Besançon L, Peiffer-Smadja N, Segalas C, Jiang H, Masuzzo P, Smout C, et al. Open Science  
693 Saves Lives: Lessons from the COVID-19 Pandemic. bioRxiv. 2020; 2020.08.13.249847.  
694 doi:10.1101/2020.08.13.249847
- 695 26. Ding Y, Zhang G, Chambers T, Song M, Wang X, Zhai C. Content-based citation analysis: The  
696 next generation of citation analysis. J Assoc Inf Sci Technol. 2014;65: 1820–1833.  
697 doi:https://doi.org/10.1002/asi.23256
- 698 27. Paul M, Girju R. Topic Modeling of Research Fields: An Interdisciplinary Perspective.  
699 Proceedings of the International Conference RANLP-2009. Borovets, Bulgaria: Association for  
700 Computational Linguistics; 2009. pp. 337–342. Available:  
701 <https://www.aclweb.org/anthology/R09-1061>
- 702 28. Knoth P, Herrmannova D. Towards Semantometrics: A New Semantic Similarity Based Measure  
703 for Assessing a Research Publication’s Contribution. -Lib Mag. 2014;20. Available:  
704 <http://oro.open.ac.uk/42527/>
- 705 29. Wadden D, Lin S, Lo K, Wang LL, van Zuylen M, Cohan A, et al. Fact or Fiction: Verifying  
706 Scientific Claims. ArXiv200414974 Cs. 2020 [cited 9 Feb 2021]. Available:  
707 <http://arxiv.org/abs/2004.14974>
- 708 30. Stab C, Kirschner C, Eckle-Kohler J, Gurevych I. Argumentation Mining in Persuasive Essays and  
709 Scientific Articles from the Discourse Structure Perspective. In: Cabrio E, Villata S, Wyner A,  
710 editors. Proceedings of the Workshop on Frontiers and Connections between Argumentation  
711 Theory and Natural Language Processing. Bertinoro, Italy: CEUR-WS; 2014. Available:  
712 <http://ceur-ws.org/Vol-1341/paper5.pdf>
- 713 31. Bronner A, Monz C. User Edits Classification Using Document Revision Histories. Proceedings of  
714 the 13th Conference of the European Chapter of the Association for Computational Linguistics.  
715 Avignon, France: Association for Computational Linguistics; 2012. pp. 356–366. Available:  
716 <https://www.aclweb.org/anthology/E12-1036>
- 717 32. Schiermeier Q. Initiative pushes to make journal abstracts free to read in one place. Nature.  
718 2020 [cited 9 Feb 2021]. doi:10.1038/d41586-020-02851-y
- 719 33. Le Q, Mikolov T. Distributed Representations of Sentences and Documents. International  
720 Conference on Machine Learning. PMLR; 2014. pp. 1188–1196. Available:  
721 <http://proceedings.mlr.press/v32/le14.html>
- 722 34. Fraser N, Momeni F, Mayr P, Peters I. The relationship between bioRxiv preprints, citations and  
723 altmetrics. Quant Sci Stud. 2020; 1–21. doi:10.1162/qss\_a\_00043
- 724 35. Chamberlain S, Zhu H, Jahn N, Boettiger C, Ram K. rcrossref: Client for Various “CrossRef”  
725 “APIs.” 2020. Available: <https://CRAN.R-project.org/package=rcrossref>

726

727





729 **Figures**

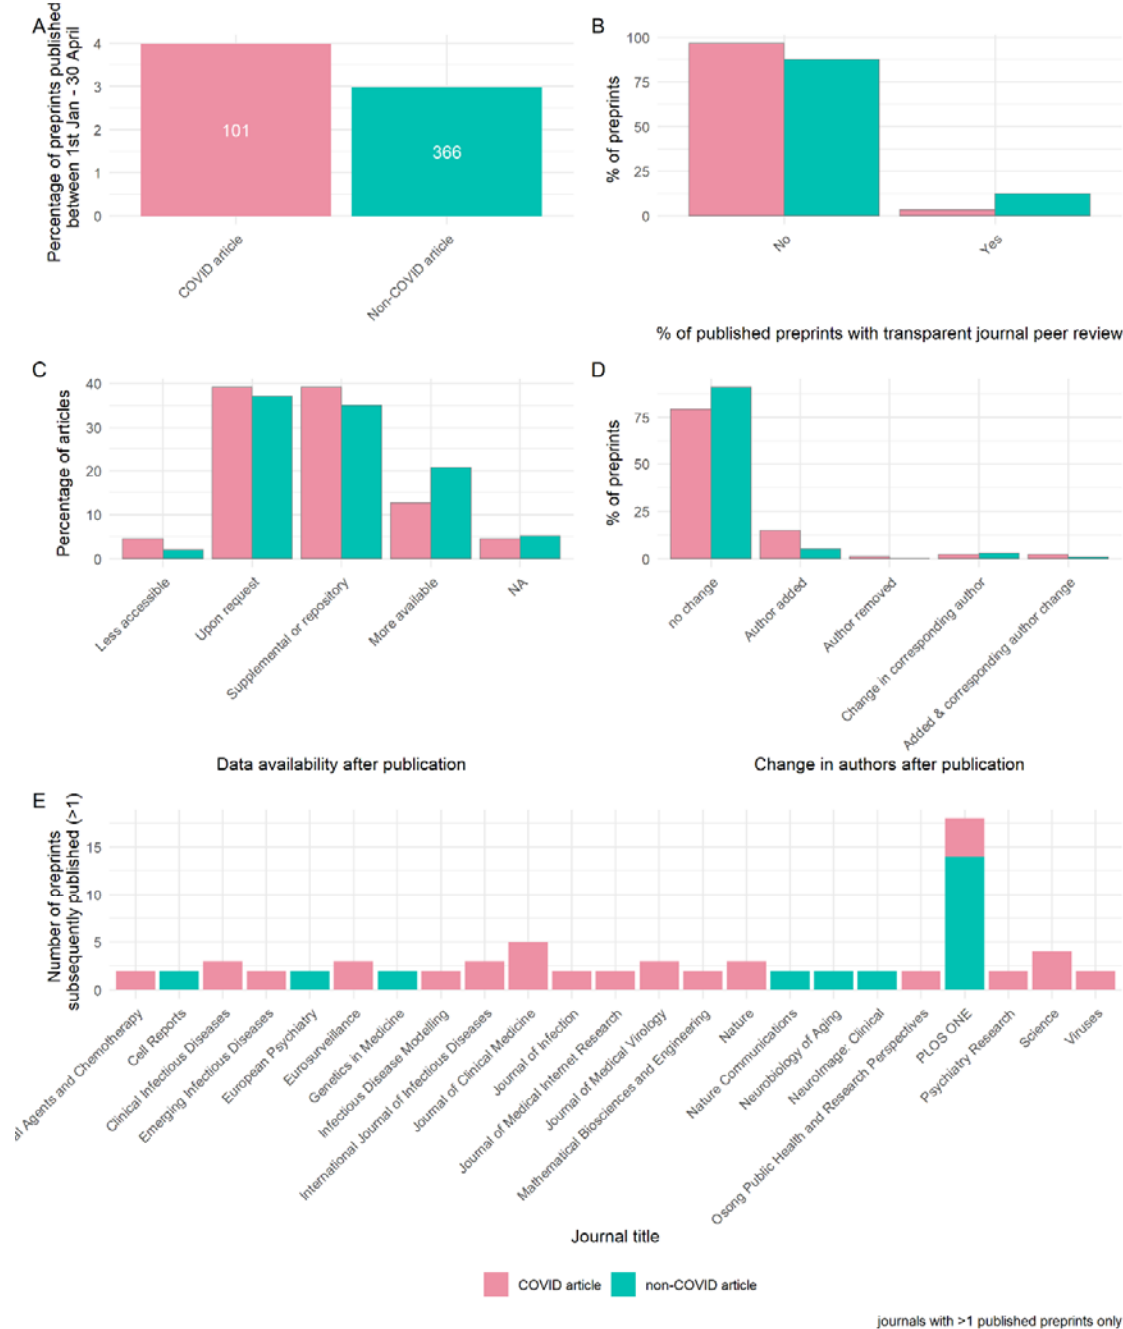

730

731 **Figure 1. Publishing and peer review of preprints during the COVID-19 pandemic.** (A) Percentage of  
732 COVID-19 and non-COVID-19 preprints published by 30<sup>th</sup> April 2020. Labels denote absolute number.  
733 (B) Percentage of published preprints associated with transparent peer review (the publication of  
734 review reports with the journal version of the article). (C) Data availability after publication. (D)  
735 Change in authorship after publication. (E) Journals that are publishing preprints. Panel (A) describes  
736 all available data (n = 14,812 preprints), while panels (B) – (E) describe sample of preprints analysed  
737 in detail (n = 184).

738

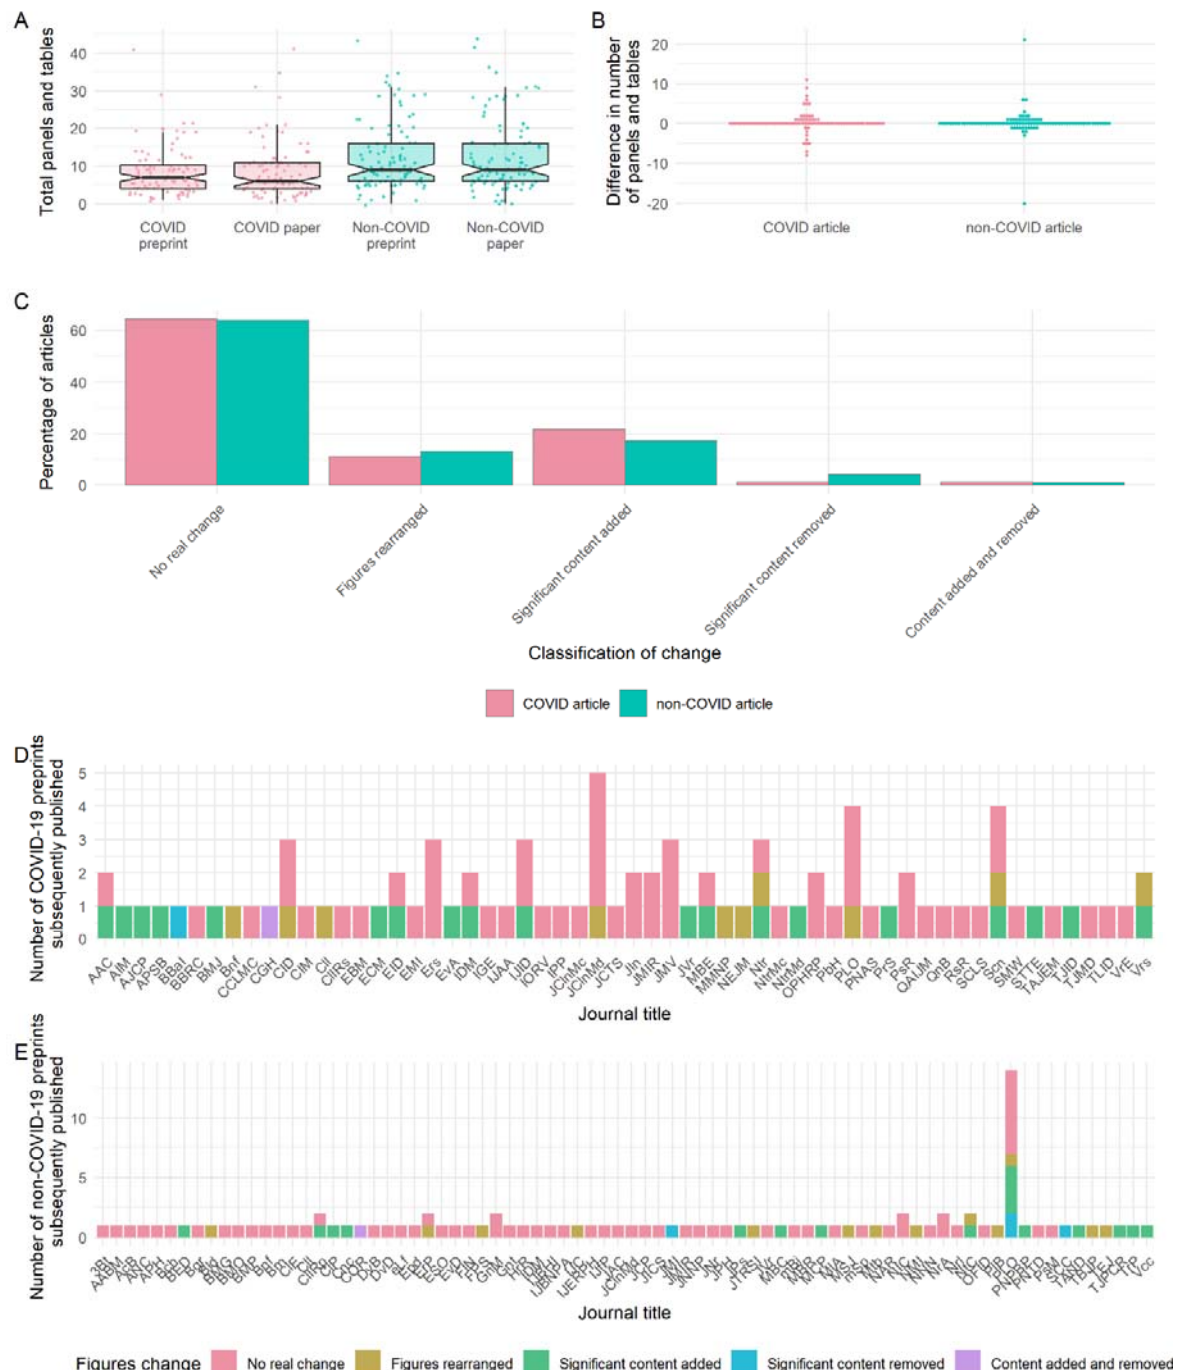

739

740 **Figure 2. Preprint-publication pairs do not significantly differ in the total numbers of panels and**  
741 **tables.** (A) Total numbers of panels and tables in preprints and published articles. Boxplot notches  
742 denote approximated 95% confidence interval around medians. (B) Difference in the total number of  
743 panels and tables between the preprint and published versions of articles. (C) Classification of figure  
744 changes between preprint and published articles. (D) Journals publishing COVID-19 preprints, based  
745 on annotated changes in panels. (E) Journals publishing non-COVID-19 preprints, based on  
746 annotated changes in panels. All panels describe sample of preprints analysed in detail (n = 184). See  
747 Supplemental Text 1 for key to abbreviated journal labels.

748

749

750

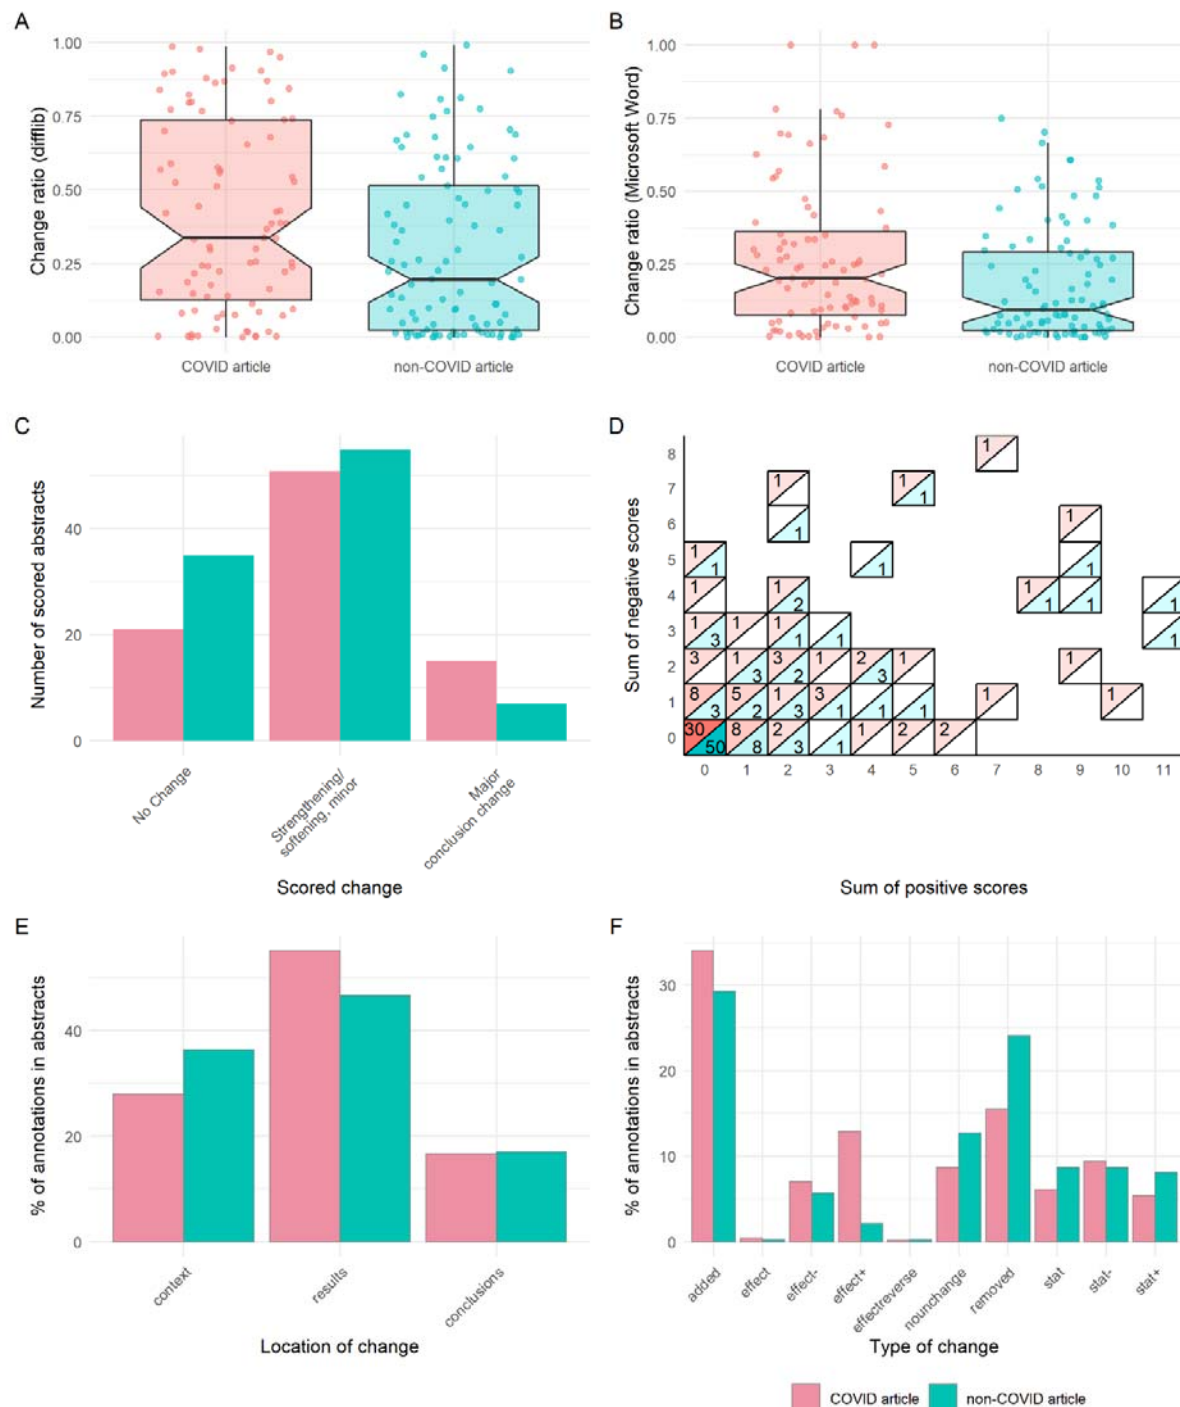

**Figure 3. Preprint-publication abstract pairs have substantial differences in text, but not interpretation.** (A) Diffib calculated change ratio for COVID-19 or non-COVID-19 abstracts. (B) Change ratio calculated from Microsoft Word for COVID-19 or non-COVID-19 abstracts. (C) Overall changes in abstracts for COVID-19 or non-COVID-19 abstracts. (D) Sum of positive and negative annotations for COVID-19 or non-COVID-19 abstracts, with colour and label denoting number of abstracts with each particular sum combination. (E) Location of annotations within COVID-19 or non-COVID-19 abstracts. (F) Type of annotated change within COVID-19 or non-COVID-19 abstracts. All

panels describe sample of abstracts analysed in detail (n = 184). Boxplot notches denote approximated 95% confidence interval around medians.

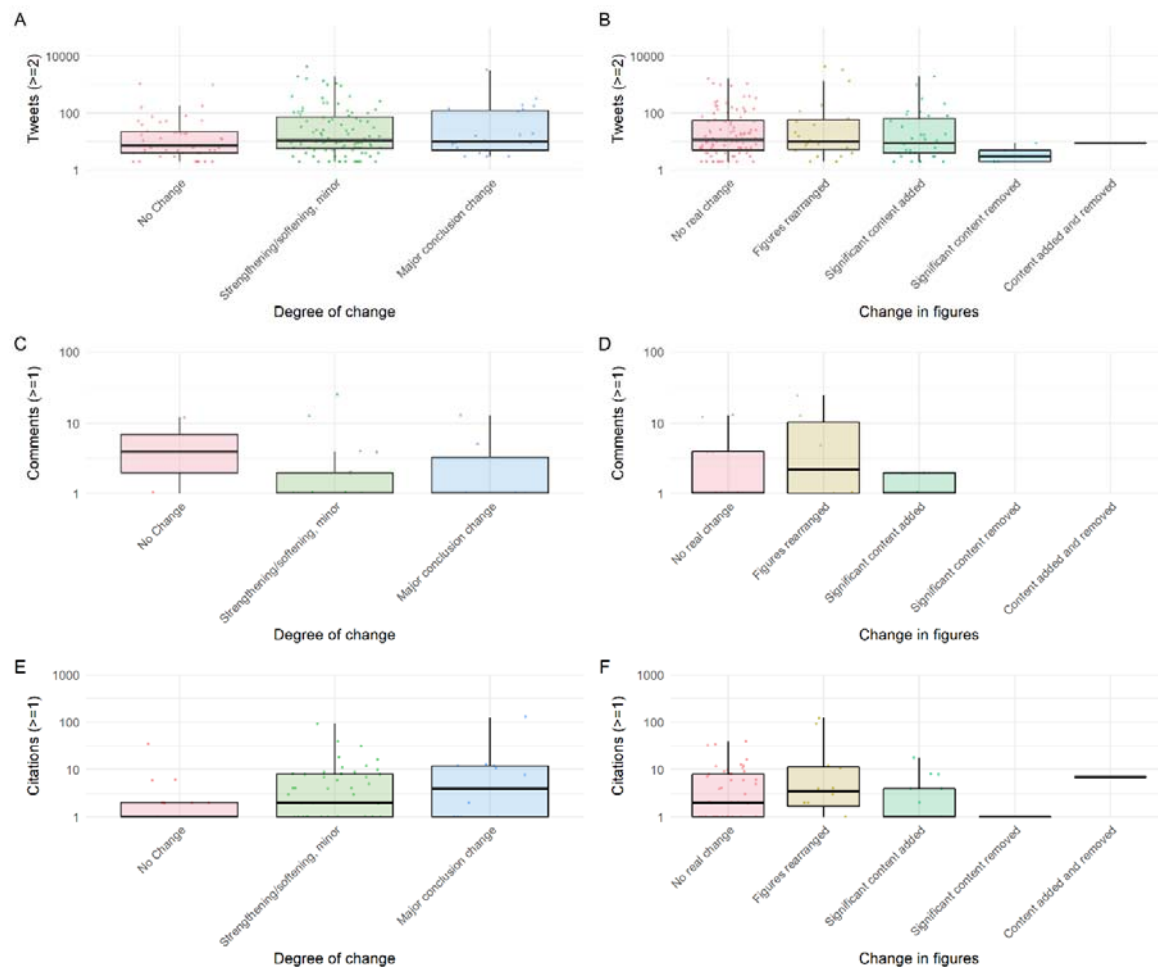

**Figure 4. Altmetric data for overall degree of change in abstracts and figures.** (A) Number of tweets (at least 2) and overall abstract change. (B) Number of tweets (at least 2) and overall change in figures. (C) Number of comments (at least 1) and overall abstract change. (D) Number of comments (at least 1) and overall change in figures. (E) Number of preprint citations (at least 1) based on overall abstract change. (F) Number of preprint citations (at least 1) based on overall change in figures.

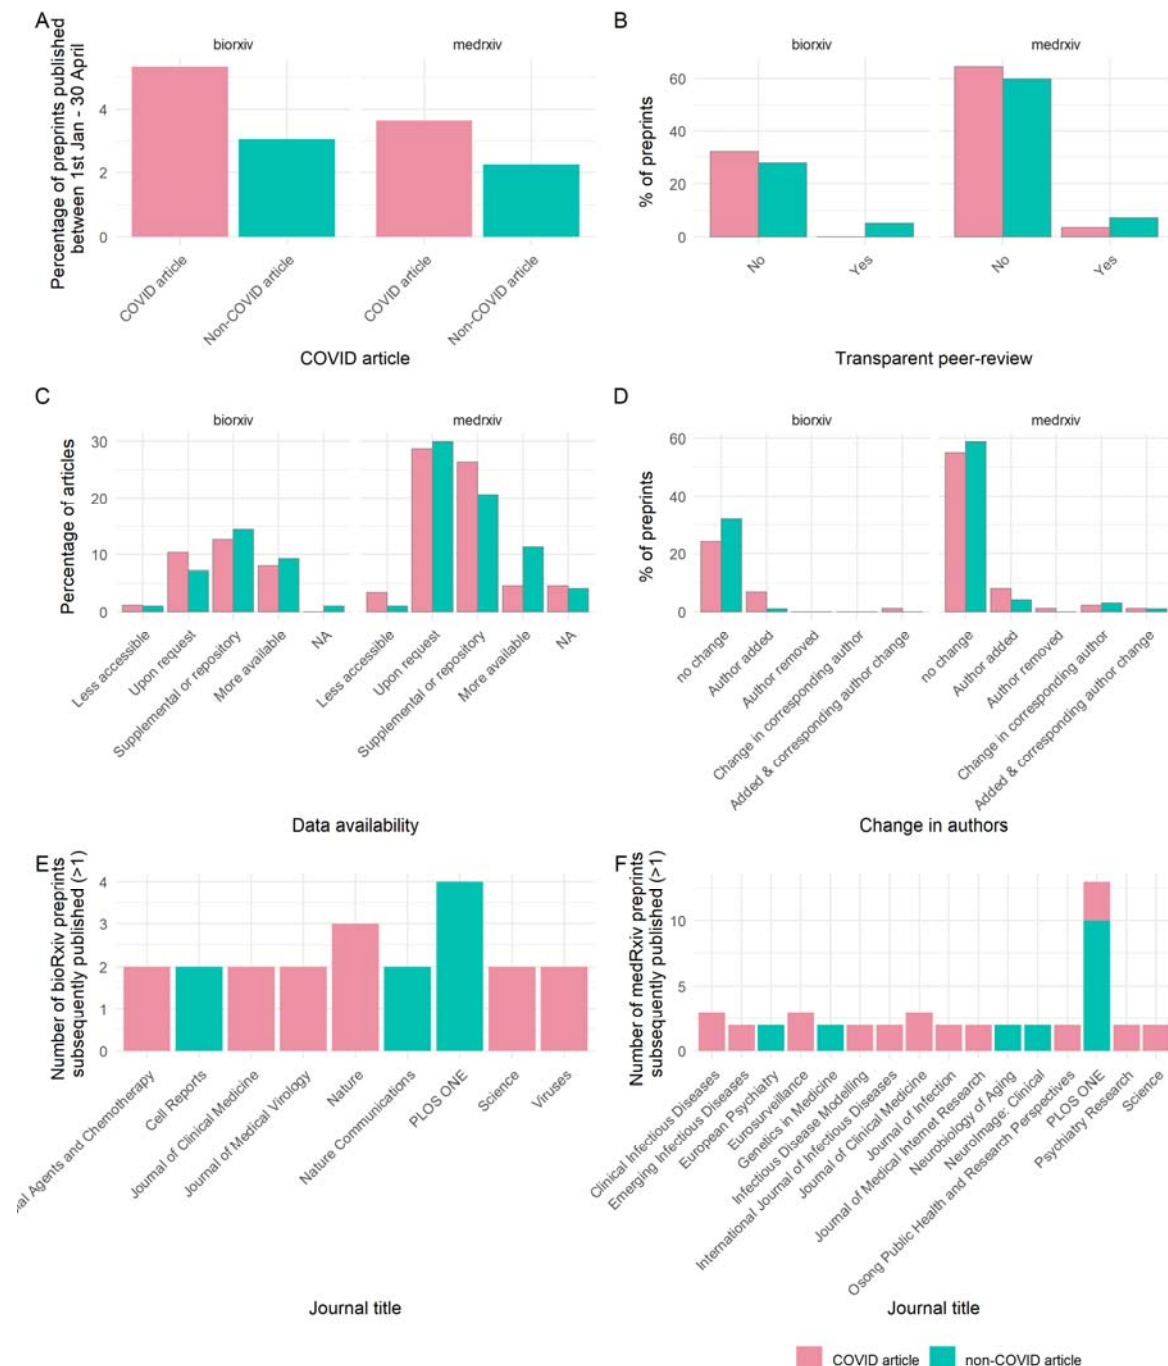

**Supplemental Figure 1. Publishing and peer-review of preprints during the COVID-19 pandemic broken down by server.** (A) Percentage of COVID-19 and non-COVID-19 preprints published by 30th April 2020. (B) Published preprints associated with transparent peer-review. (C) Data availability for published preprints. (D) Change in authorship for published preprints. (E) Journals that are publishing bioRxiv preprints. (F) Journals that are publishing medRxiv preprints.

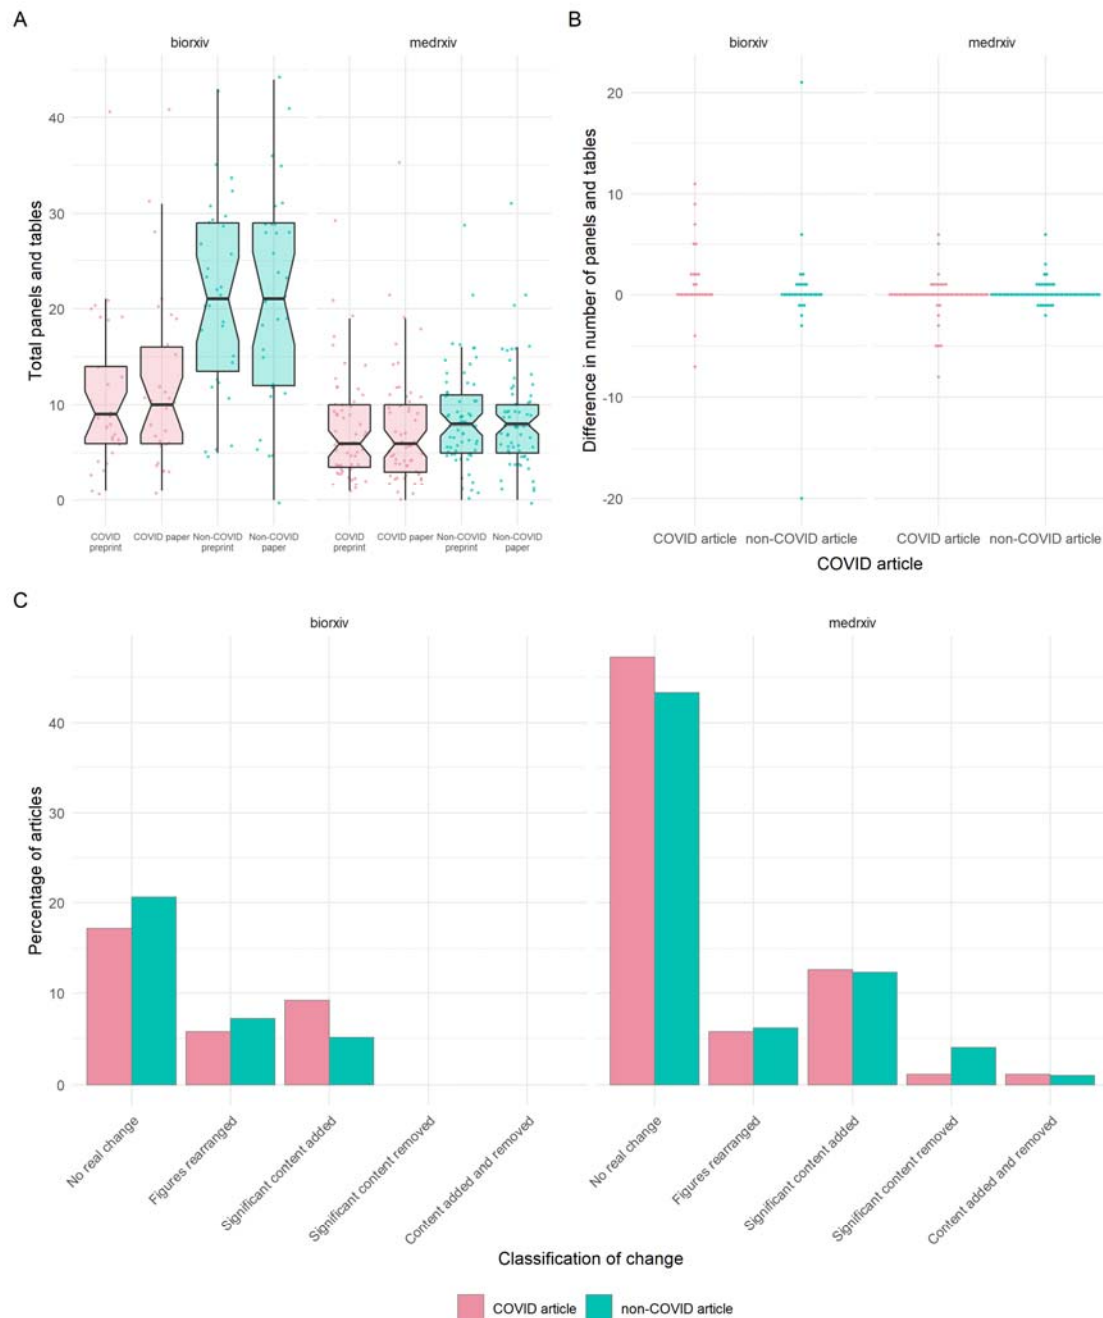

**Supplemental Figure 2. Preprint-publication pairs do not significantly differ in the total numbers of panels and tables as broken down by server.** (A) Total numbers of panels and tables in preprints and published articles. Boxplot notches denote approximated 95% confidence interval around medians. (B) Difference in the total number of panels and tables between the preprint and published versions of articles. (C) Classification of figure changes between preprint and published articles.



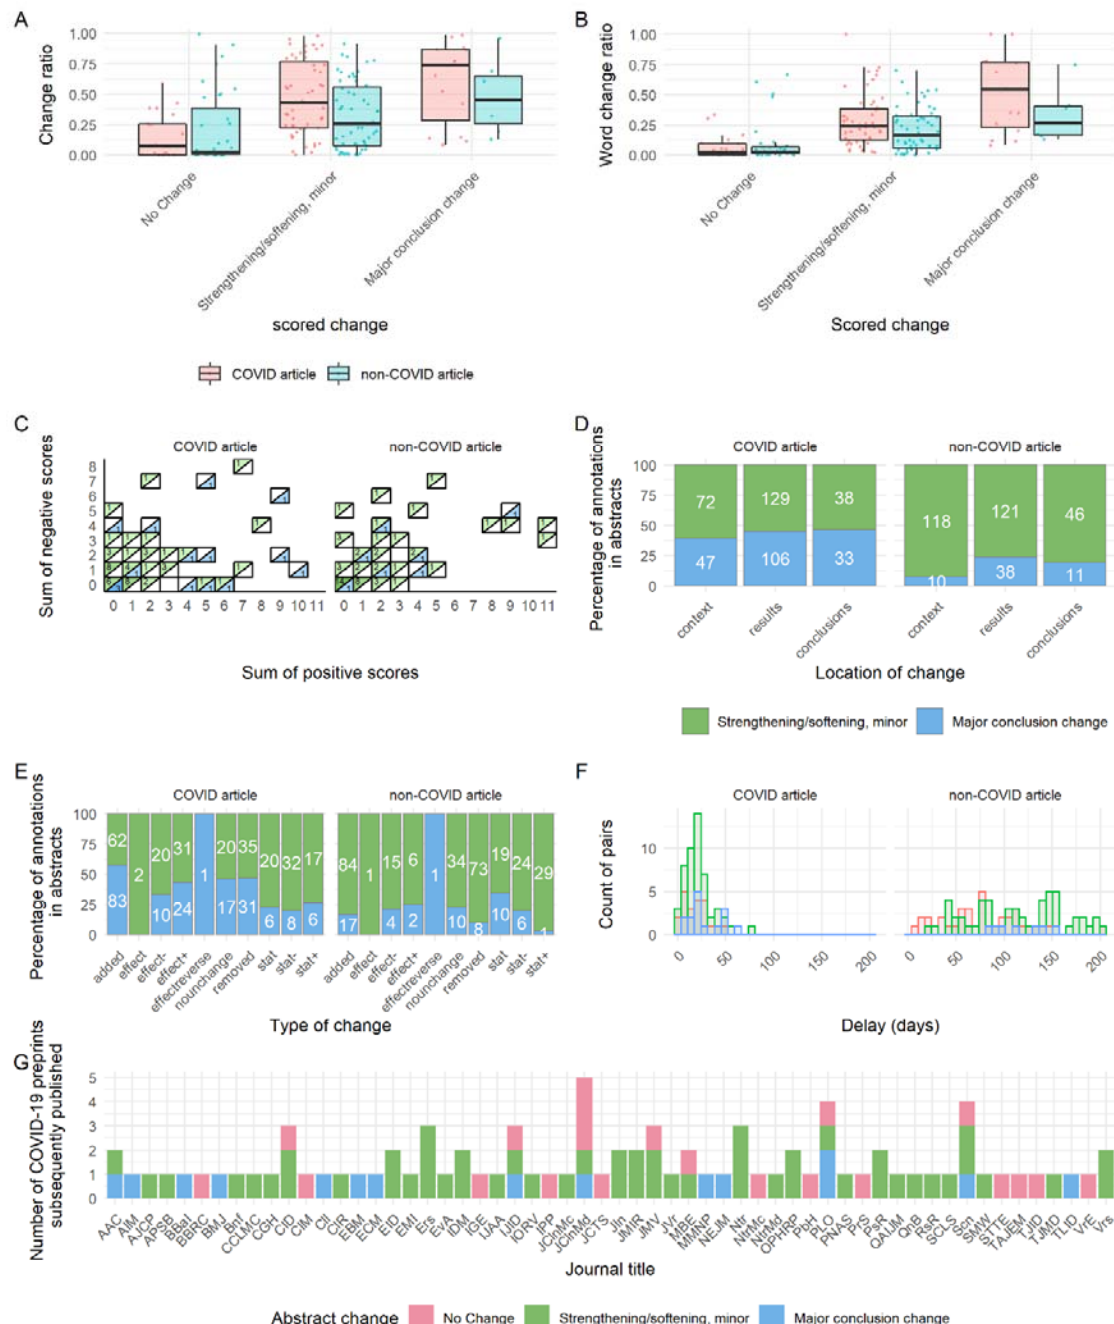

**Supplemental Figure 3. Granular annotations of changes in abstracts in context of the overall change.** (A) DiffBil calculated change ratio for COVID-19 or non-COVID-19 abstracts, based on the overall abstract change. (B) Change ratio calculated from Microsoft Word for COVID-19 or non-COVID-19 abstracts, based on the overall abstract change. (C) Sum of positive and negative annotations based on the overall abstract change, with colour and label denoting number of abstracts with each particular sum combination. 21 COVID-19 preprints and 35 non-COVID-19 preprints rated 'No change' (i.e. sum of positive and negative scores = 0) are not depicted. (D) Percentage of annotations in each location within COVID-19 or non-COVID-19 abstracts, based on the overall abstract change. Labels denote absolute number of annotations. (E) Percentage of annotations of each type within COVID-19 or non-COVID-19 abstracts, based on the overall abstract

change. Labels denote absolute number of annotations. (F) Delay (in days) between preprint posting and publication in a journal, based on overall abstract changes. (G) Journals publishing COVID-19 preprints, based on overall abstract changes. See Supplemental Text 1 for key to abbreviated journal labels.

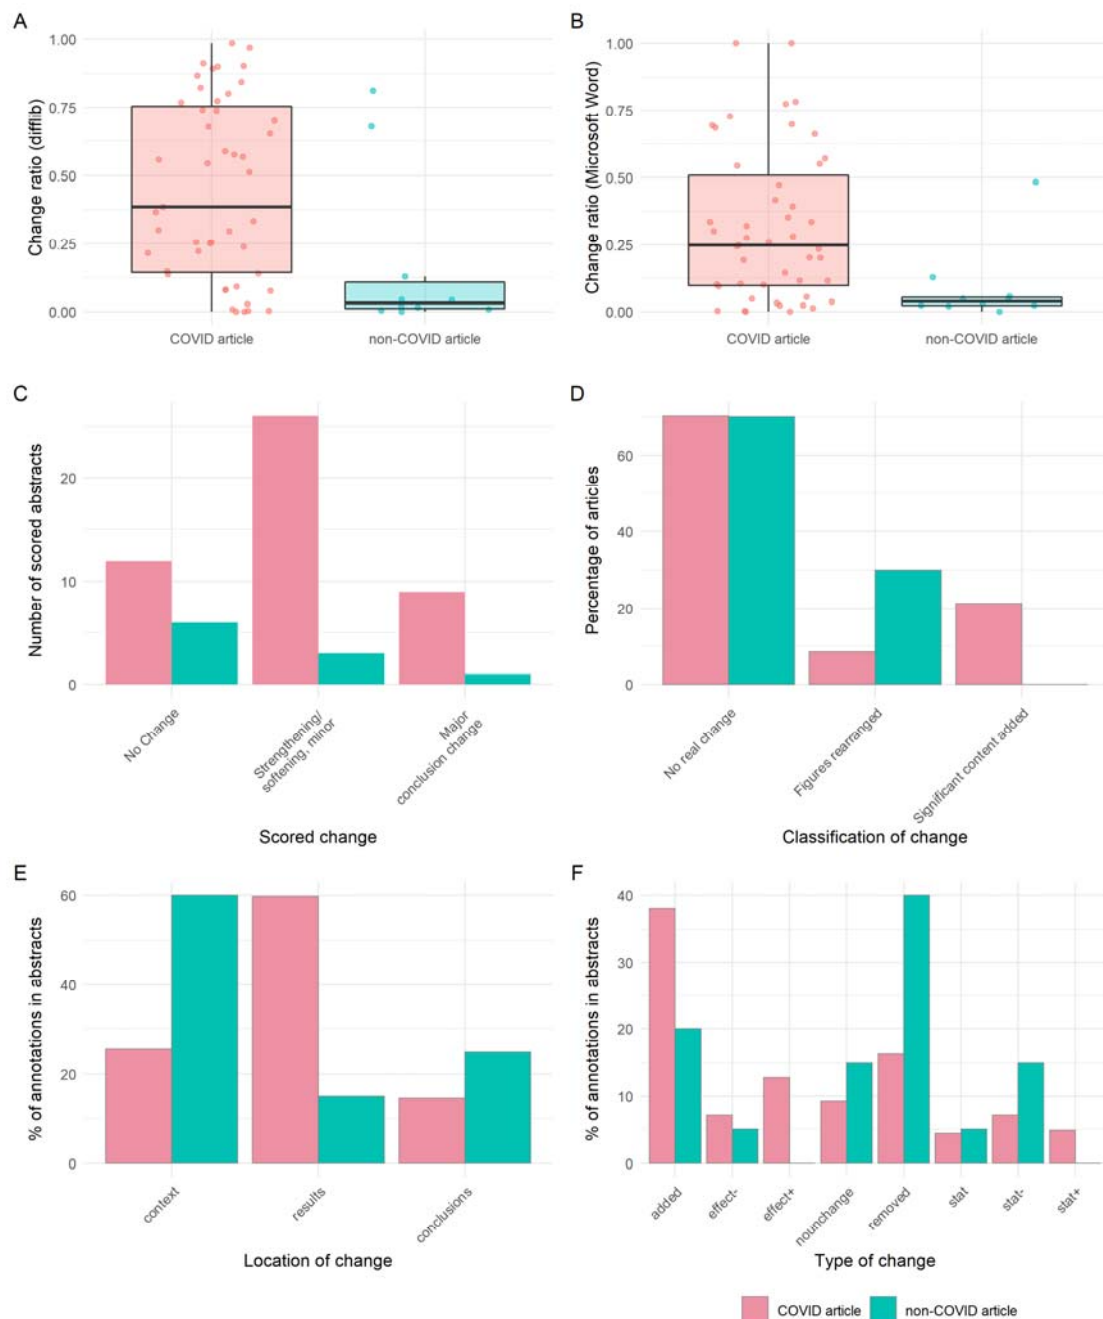

801

802 **Supplemental Figure 4. Automated and manually annotated degrees of change to preprints are**  
803 **consistent within infectious disease or epidemiology-related medRxiv preprints (n = 57).** (A) Diffli  
804 calculated change ratio for COVID-19 or non-COVID-19 abstracts. (B) Change ratio calculated from  
805 Microsoft Word for COVID-19 or non-COVID-19 abstracts. (C) Overall changes in abstracts for COVID-  
806 19 or non-COVID-19 abstracts. (D) Classification of figure changes between preprint and published

807 articles for COVID-19 or non-COVID-19 abstracts. (E) Location of annotations within COVID-19 or  
808 non-COVID-19 abstracts. (F) Type of annotated change within COVID-19 or non-COVID-19 abstracts.

## 809 [Supplemental Material](#)

810

811 **Supplemental Table 1. Journals posting preprints from 1<sup>st</sup> Jan – 30<sup>th</sup> April 2020 or 4<sup>th</sup> September**  
 812 **2019 – 30<sup>th</sup> April 2020.**

813 **Supplemental Table 2. Examples of changes in abstracts between the preprint and published**  
 814 **version of an article**

815 **Supplemental Table 3. All changes in abstracts that resulted in a major conclusion change**

816 **Supplemental Material 1. Abstract annotations utilised for the analysis in this study**

817 **Supplemental Material 2. Non-resolved abstract annotations provided for NLP researchers**

818 **Supplemental Methods 1. Questionnaire used for assessing manuscript metadata, panels and**  
 819 **tables**

820 **Supplemental Methods 2. Rubric for annotating abstracts**

821 **Supplemental Methods 3. Protocol for comparing and extracting annotations from Word files**

822 **Supplemental Text 1. Key for journal abbreviations from Figure 2D, 2E, Supplemental Figure 3G**
